# Supplementary material for: Ce-MOF with Intrinsic Haloperoxidase-Like Activity for Ratiometric Colorimetric Detection of Hydrogen Peroxide
Source: MDPI journal article supplement (doi:10.3390/bios11070204), 2021-06-23
Supplement: s1 [file s1]

# **Ce-MOF with intrinsic haloperoxidase-like activity for ratiometric colorimetric detection of hydrogen peroxide**

## **Supplementary Material**

Yanyan Cheng, Ling Liang, Fanggui Ye\* and Shulin Zhao

State Key Laboratory for the Chemistry and Molecular Engineering of Medicinal Resources, School of Chemistry and Pharmaceutical Sciences Guangxi Normal University, Guilin 541004, P. R. China.

\*Correspondence: [fgye@mailbox.gxnu.edu.cn](mailto:fgye@mailbox.gxnu.edu.cn); Tel.: +86-773-5856104;

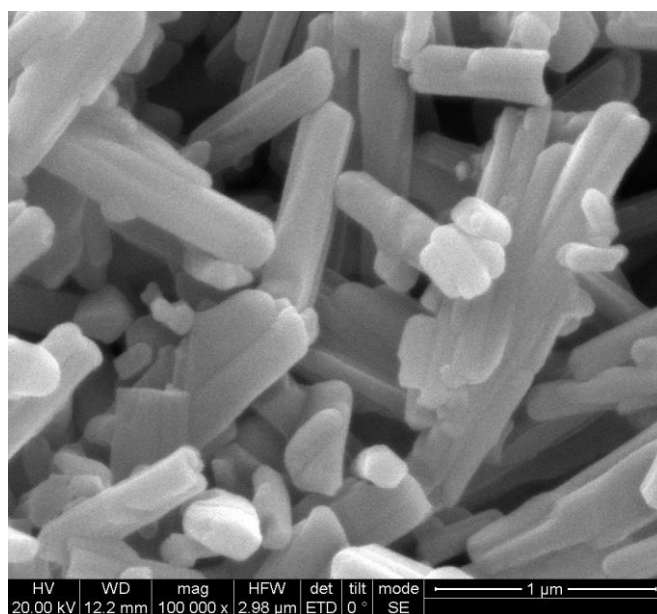

**Figure S1** SEM image of the original Ce-MOF.

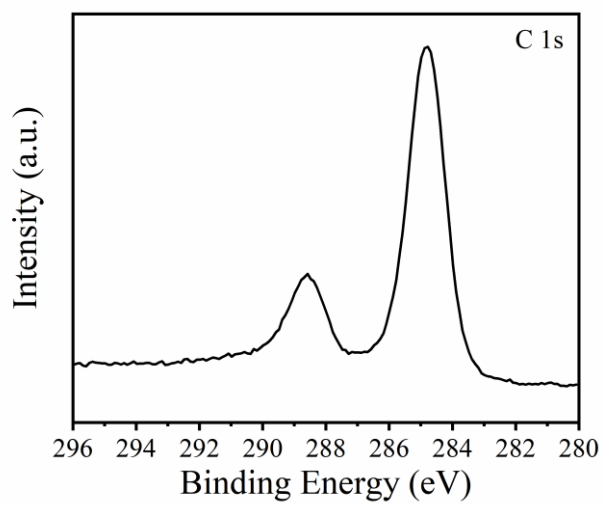

**Figure S2** C1s XPS high-resolution spectra of MVCM.

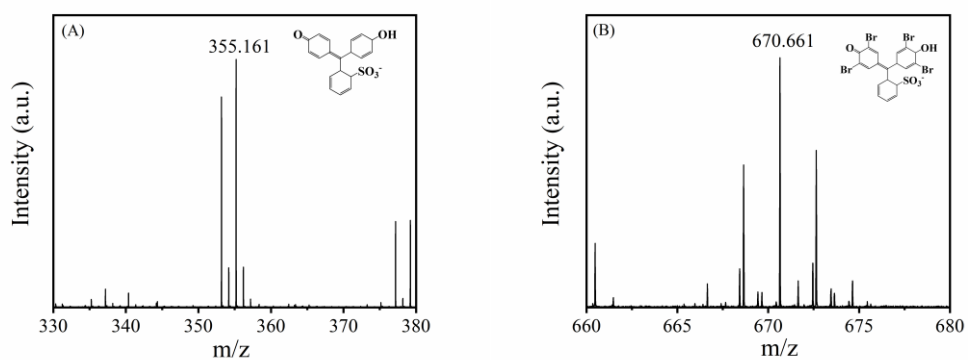

**Figure S3** MALDI-TOF MS spectra (positive ion modes) of (A) phenol red and (B) bromophenol blue.

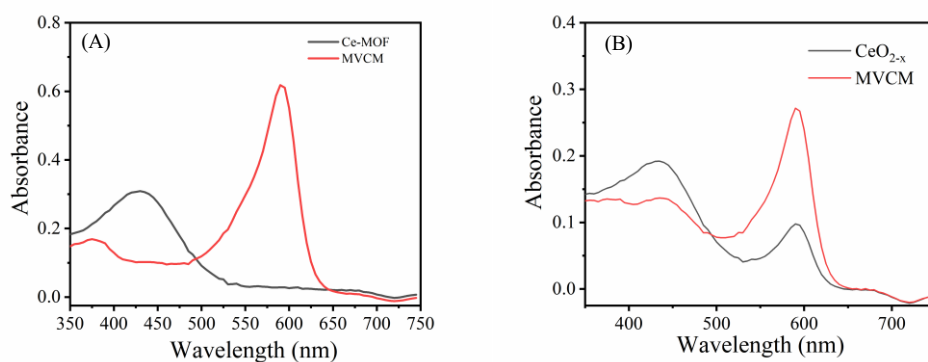

**Figure S4** The absorption spectrum of MVCM and original Ce-MOF (A),  $\text{CeO}_{2-x}$  and MVCM (B) under the same reaction condition.

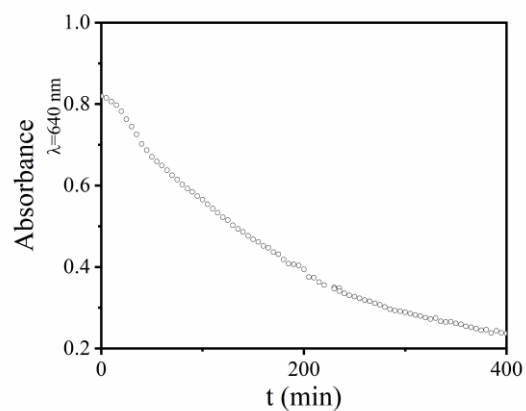

**Figure S5** The bleaching of celestine blue (CB) at 640 nm indicates the formation of oxidized bromine species (e.g.,  $\text{OBr}^-$ ).

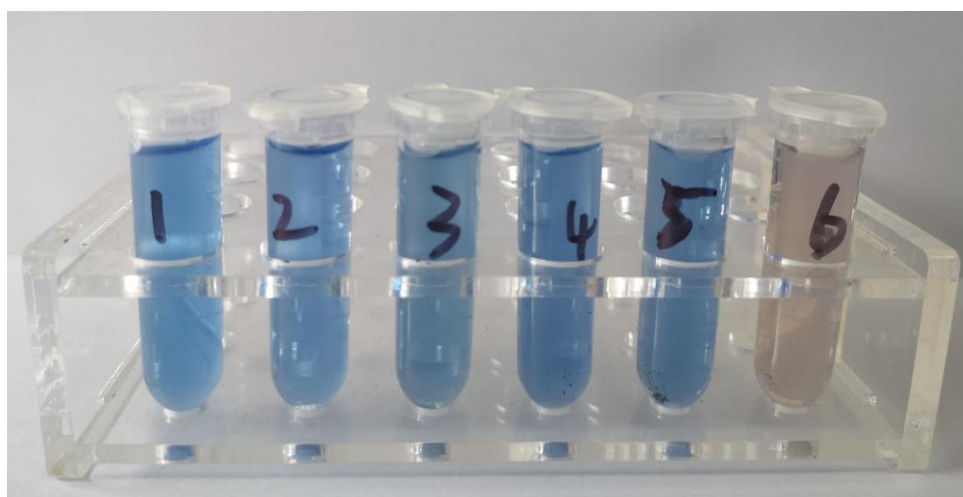

**Figure S6** Celestine blue (CB) reacts in different systems. (1.  $\text{MVCM} + \text{NH}_4\text{Br} + \text{CB}$ ; 2.  $\text{H}_2\text{O}_2 + \text{NH}_4\text{Br} + \text{CB}$ ; 3.  $\text{MVCM} + \text{H}_2\text{O}_2 + \text{CB}$ ; 4.  $\text{MVCM} + \text{CB}$ ; 5.  $\text{H}_2\text{O}_2 + \text{CB}$ ; 6.  $\text{MVCM} + \text{NH}_4\text{Br} + \text{H}_2\text{O}_2 + \text{CB}$ ).

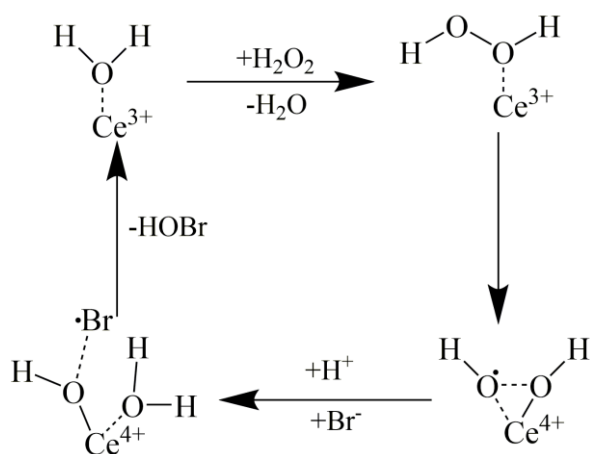

**Figure S7** Probable catalytic mechanism of the MVCM as haloperoxidase mimic.

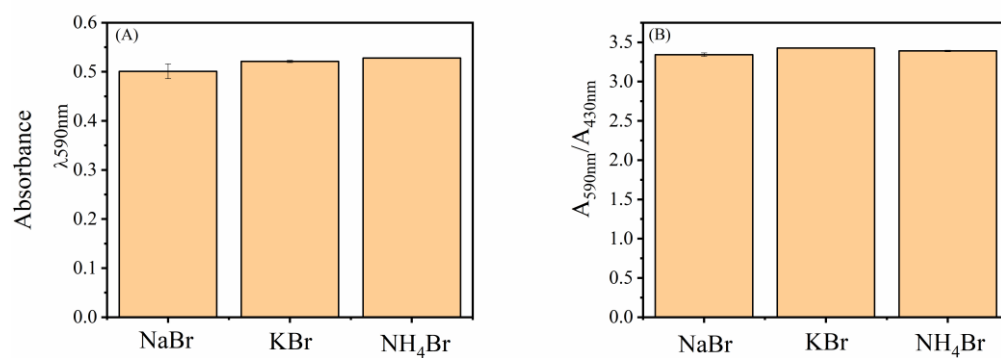

**Figure S8** Dependence on the bromine source.

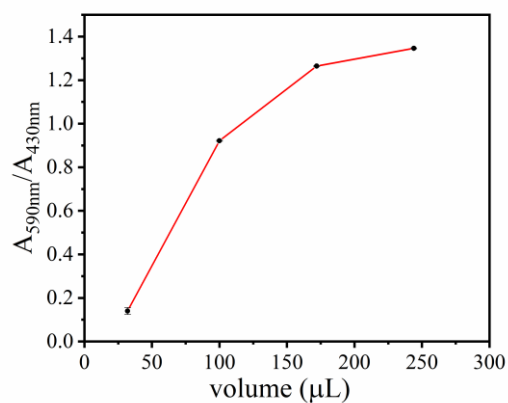

**Figure S9** Ce-MOF was treated with different NaOH/H<sub>2</sub>O<sub>2</sub> volume.

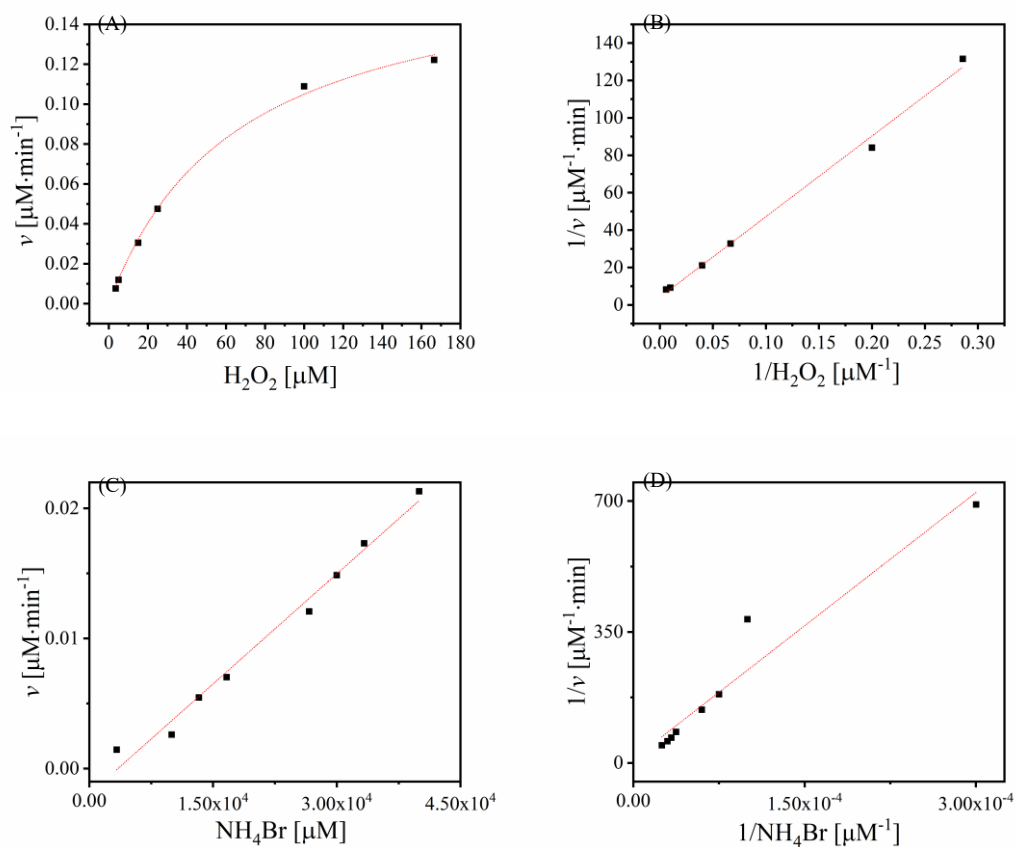

**Figure S10** Steady-state kinetic assays of MVCM. The  $H_2O_2$  concentration was varied, the concentration of  $NH_4Br$  and PR was fixed (A); the  $NH_4Br$  concentration was varied, the concentration of  $H_2O_2$  and PR was fixed (C); and the double-reciprocal plots of haloperoxidase-like activity of MVCM with a fixed concentration of one substrate relative to varying concentration of the other substrate (B and D).

**Table S1.** A comparison of  $K_m$  value for materials-based haloperoxidase mimics.

| Materials                  | Substrate                     | $K_m$ (M)            | Ref.      |
|----------------------------|-------------------------------|----------------------|-----------|
| CeO <sub>2</sub> @C        | H <sub>2</sub> O <sub>2</sub> | $2.1 \times 10^{-3}$ | [1]       |
|                            | Br <sup>-</sup>               | 0.5                  |           |
| CeO <sub>2-x</sub> nanorod | H <sub>2</sub> O <sub>2</sub> | $2.6 \times 10^{-4}$ | [2]       |
|                            | Br <sup>-</sup>               | 0.35                 |           |
| MVCM                       | H <sub>2</sub> O <sub>2</sub> | $1.0 \times 10^{-4}$ | This work |
|                            | Br <sup>-</sup>               | 0.22                 |           |

**Table S2.** Comparison detection limit in different catalyst systems by means of different methods.

| Materials                    | Method           | Detection limit ( $\mu$ M) | Ref.      |
|------------------------------|------------------|----------------------------|-----------|
| flake-like Cu <sub>2</sub> O | Electrochemistry | 90.5                       | [3]       |
| ZnCrCoO <sub>4</sub> /NCNTs  | Electrochemistry | 1                          | [4]       |
| rGO/Ag NPs                   | Electrochemistry | 31.3                       | [5]       |
| Ce-MOF                       | Fluorescence     | 10                         | [6]       |
| CuO nanoparticles            | Fluorescence     | 0.34                       | [7][7]    |
| NiFe LDH                     | Colorimetry      | 4.4                        | [8]       |
| Ni <sup>0</sup> nanoparticle | Colorimetry      | 120                        | [9]       |
| VS <sub>4</sub>              | Colorimetry      | 5                          | [10]      |
| MVCM                         | Colorimetry      | 3.25                       | This work |

Note:

ZnCrCoO<sub>4</sub>/NCNTs: ZnCrCoO<sub>4</sub> and nitrogen-doped carbon nanotubes composite

rGO/Ag NPs: reduced graphene oxide/Ag nanoparticles

NiFe LDH: NiFe layered double hydroxide nanosheets

## References

- [1] Wang, N.; Li, W.; Ren, Y.; Duan, J.; Zhai, X.; Guan, F.; Wang, L.; Hou, B. Investigating the properties of nano core-shell  $\text{CeO}_2@\text{C}$  as haloperoxidase mimicry catalyst for antifouling applications. *Colloids and Surfaces A*. 2021, 608, 125592.
- [2] Herget, K.; Herget, P.; Pusch, S.; Deglmann, P.; Götz, H.; Gorelik, T.; Gorelik Il'ya, A.; Gorelik, F.; Gorelik, T.; Gorelik, S.; Gorelik, M.; Ksenofontov, V.; Kolb, U.; Opatz, T.; André, R.; Tremel, W. Haloperoxidase Mimicry by  $\text{CeO}_{2-x}$  Nanorods Combats Biofouling. *Adv Mater*. 2017, 29, 1603823.
- [3] Wen, X.; Long, M.; Tang, A. Flake-like  $\text{Cu}_2\text{O}$  on  $\text{TiO}_2$  nanotubes array as an efficient nonenzymatic  $\text{H}_2\text{O}_2$  biosensor. *J Electroanal Chem*. 2017, 785, 33-39.
- [4] Wu, H.; Xiao, K.; Ooyang, T.; Wang, Z.; Chen, Y.; Li, N.; Liu, Z. Co-Cr mixed spinel oxide nanodots anchored on nitrogen-doped carbon nanotubes as catalytic electrode for hydrogen peroxide sensing. *J Colloid Interface Sci*. 2021, 585, 605-613.
- [5] Liu, S.; Tian, J.; Wang, L.; Sun, X. A method for the production of reduced graphene oxide using benzylamine as a reducing and stabilizing agent and its subsequent decoration with Ag nanoparticles for enzymeless hydrogen peroxide detection. *Carbon*. 2011, 49, 3158-3164.
- [6] Abdelhamid, H.; Sharmoukh, W. Intrinsic catalase-mimicking MOFzyme for sensitive detection of hydrogen peroxide and ferric ions. *Microchem J*. 2021, 163, 105873.
- [7] Hu, A.; Liu, Y.; Deng, H.; Hong, G.; Liu, A.; Xia, X.; Chen, W. Fluorescent hydrogen peroxide sensor based on cupric oxide nanoparticles and its application for glucose and l-lactate detection. *Biosens Bioelectron*. 2014, 61, 374-378.
- [8] Zhan, T.; Kang, J.; Li, X.; Pan, L.; Li, G.; Hou, W. NiFe layered double hydroxide nanosheets as an efficiently mimic Enzyme for colorimetric determination of glucose and  $\text{H}_2\text{O}_2$ . *Sens Actuators B*



Chem. 2018, 255, 2635-2642.

[9] Zarif, F.; Rauf, S.; Khurshid, S.; Muhammad, N.; Hayat, A.; Rahim, A.; Shah, N.; Yang, C. Effect of pyridinium based ionic liquid on the sensing property of Ni<sup>0</sup> nanoparticle for the colorimetric detection of hydrogen peroxide. J. Mol. Struct. 2020, 219, 128620.

[10] Chao, C.; Wang, Y.; Zhang, D. Peroxidase-like activity of vanadium tetrasulfide submicrospheres and its application to the colorimetric detection of hydrogen peroxide and L-cysteine. Microchim Acta. 2019, 186, 784.
